## Expression of Concern

# Expression of Concern: MiR-106b-5p Regulates the Migration and Invasion of Colorectal Cancer Cells by Targeting FAT4

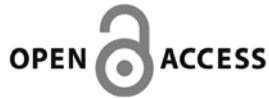

The Editorial Office has been made aware of potential issues surrounding the scientific validity of this paper, hence has issued an expression of concern to notify readers whilst the Editorial Office investigates.

Version of Record published:  
07 April 2021
